# Supplementary material for: Evaluating the significance of contact maps in low-homology protein modeling using contact-assisted threading
Source: PubMed Central journal article supplement (PMC7031282; doi:10.1038/s41598-020-59834-2), 2020-02-19
Supplement: 41598_2020_59834_MOESM1_ESM.pdf [file 41598_2020_59834_MOESM1_ESM.pdf]

# **Evaluating the significance of contact maps in low-homology protein modeling using contact-assisted threading**

**Sutanu Bhattacharya<sup>1</sup>, Debswapna Bhattacharya<sup>1,2\*</sup>**

<sup>1</sup>Department of Computer Science and Software Engineering, <sup>2</sup>Department of Biological Sciences, Auburn University, Auburn, AL 36849, USA.

\*To whom correspondence should be addressed. Phone: (334) 844-6321. Fax: (334) 844-6329. E-mail: [bhattacharyad@auburn.edu](mailto:bhattacharyad@auburn.edu).

**Supplementary Figure S1. The relationship between changes in TM-score of contact-assisted threading methods compared to the baseline pure threading method, and the MCC of predicted contact maps, tested on PSICOV150.** The targets are grouped into three bins based on their sequence length. (A) 34 targets of sequence length < 100 residues are considered. This set includes 136 instances, considering all four contact-assisted threading methods. (B) 47 targets of sequence length [100,150] residues are considered, resulting in a total of 188 instances by considering all four methods. (C) 67 targets of sequence length >150 residues are considered, resulting in a total of 268 instances by considering all four contact-assisted threading methods. See Figure 4 in the main manuscript for more explanation.

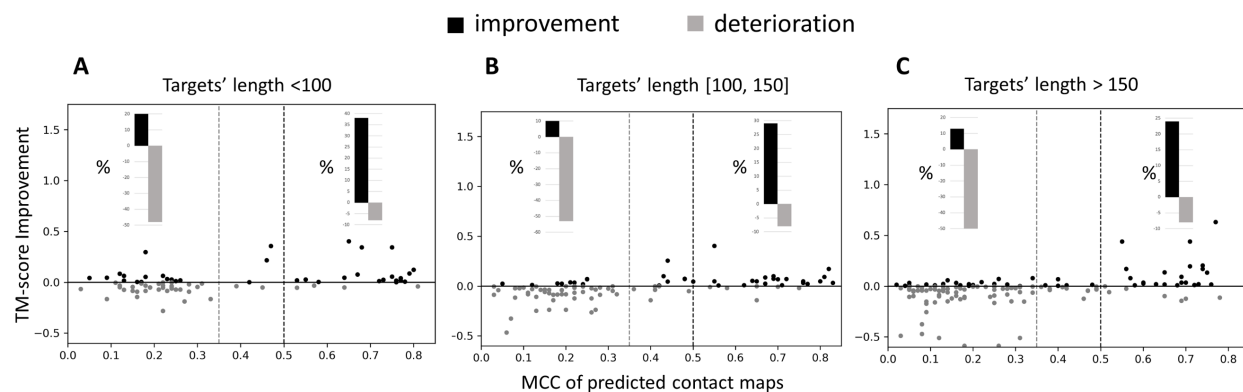

**Supplementary Figure S2. The relationship between changes in TM-score of contact-assisted threading methods compared to the baseline pure threading method, and the MCC of predicted contact maps, tested on officially released 20 full-length targets of CASP13.** This set includes a total of 40 instances, considering two contact-assisted threading methods. Out of these, there are 29 instances with high-quality contacts ( $MCC \geq 0.5$ ) as opposed to only one instance (TripletRes contact map for T1008) with an  $MCC < 0.35$ . An instance for which there is a change in TM-score (either positive or negative) compared to the baseline pure threading is only plotted. See Figure 4 in the main manuscript for more explanation.

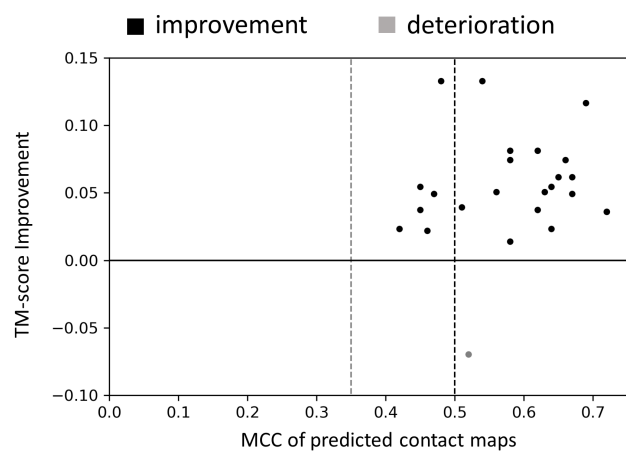

**Supplementary Figure S3. A representative example of contact-assisted threading with top2 officially ranked contact predictors of CASP13 on target T0954.** (A) Structural alignment between the top ranked model predicted by pure threading method (in thick red) with a TM-score of 0.301 and the native structure of the target (in thin gray), (B) Structural alignment between top ranked model predicted by threading methods using high-quality ( $MCC \geq 0.5$ ) contacts, TripletRes (in thick salmon red) and RaptorX-contact (in thick limon yellow), with TM-score of  $> 0.56$  and the native structure of the target (in thin gray).

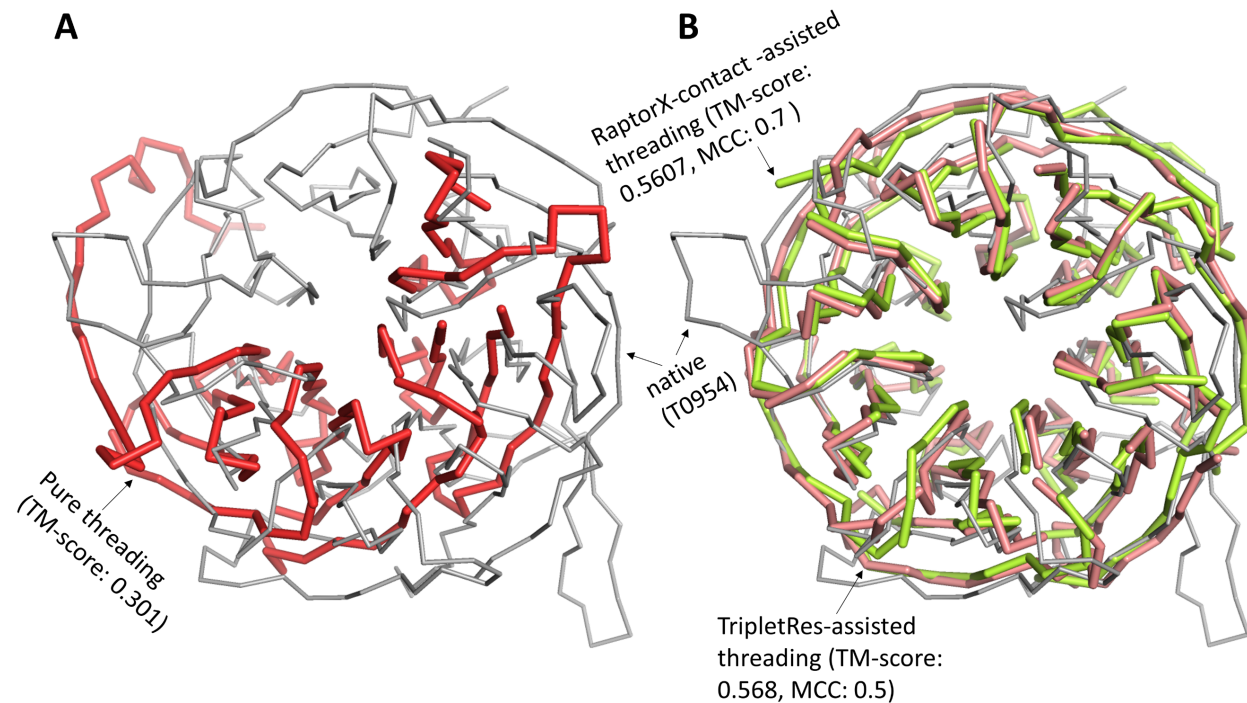

**Supplementary Table S1. Evaluation of contact maps on PSICOV 148 targets\***

| Target | PSICOV_rr |       |      |        |      | mfDCA_rr |      |      |        |      | metaPSICOV_rr |       |      |        |      | RaptorX_rr |       |      |        |      |
|--------|-----------|-------|------|--------|------|----------|------|------|--------|------|---------------|-------|------|--------|------|------------|-------|------|--------|------|
|        | prec      | cov   | m_e  | spread | mcc  | prec     | cov  | m_e  | spread | mcc  | prec          | cov   | m_e  | spread | mcc  | prec       | cov   | m_e  | spread | mcc  |
| 1bdoA  | 94.44     | 8.85  | 0.21 | 5.9    | 0.28 | 33.33    | 0.52 | 0.91 | 39.52  | 0.03 | 79.63         | 44.79 | 0.32 | 1.64   | 0.58 | 83.8       | 78.12 | 0.45 | 1.34   | 0.8  |
| 1aoeA  | 52.44     | 10.7  | 1.3  | 3.39   | 0.23 | 33.33    | 0.25 | 1.79 | 56.19  | 0.03 | 62.89         | 30.35 | 0.89 | 3.42   | 0.43 | 60.87      | 69.4  | 0.88 | 1.04   | 0.64 |
| 1jxxA  | 63.64     | 12.1  | 1.93 | 6.85   | 0.27 | 75       | 3.24 | 0.46 | 21.07  | 0.15 | 73.24         | 44.92 | 0.61 | 3.07   | 0.57 | 73.31      | 81.86 | 0.47 | 0.8    | 0.77 |
| 1i4jA  | 90        | 7.83  | 0.25 | 8.25   | 0.26 | 82.35    | 6.09 | 2.04 | 8.29   | 0.22 | 76.92         | 39.13 | 0.38 | 2.07   | 0.54 | 63.73      | 81.74 | 1.12 | 0.48   | 0.71 |
| 1wkcA  | 65.15     | 11.41 | 1.18 | 3.29   | 0.27 | 55.56    | 3.98 | 1.39 | 11.86  | 0.14 | 73.71         | 41.64 | 0.64 | 2.89   | 0.54 | 75.99      | 61.27 | 0.83 | 0.93   | 0.67 |
| 1d0qA  | 68.75     | 12.57 | 0.52 | 3.41   | 0.28 | 80       | 4.57 | 0.17 | 11.94  | 0.19 | 72.04         | 38.29 | 0.47 | 2.45   | 0.51 | 66.2       | 80.57 | 0.49 | 0.84   | 0.72 |
| 2phyA  | 76.92     | 7.75  | 0.5  | 18.46  | 0.24 | 70.59    | 4.65 | 0.96 | 18.8   | 0.18 | 65.69         | 25.97 | 0.81 | 6.33   | 0.4  | 65.7       | 43.8  | 0.75 | 4.34   | 0.52 |
| 1ny1A  | 76.64     | 15.33 | 0.42 | 11.29  | 0.34 | 75       | 0.56 | 0.29 | 38.91  | 0.06 | 71.24         | 39.81 | 0.63 | 7.78   | 0.53 | 65.31      | 65.79 | 0.78 | 4.73   | 0.65 |
| 1nb9A  | 75.51     | 12.46 | 0.89 | 8.67   | 0.3  | 100      | 0.67 | 0    | 29.75  | 0.08 | 67.16         | 46.13 | 1.12 | 3.85   | 0.55 | 65.71      | 76.77 | 1.09 | 2.07   | 0.7  |
| 1gzcA  | 70.27     | 3.59  | 1.92 | 9.4    | 0.15 | 40       | 0.28 | 3.51 | 46.26  | 0.03 | 64.96         | 24.55 | 1.42 | 7.07   | 0.39 | 79.96      | 59.86 | 0.59 | 1.74   | 0.69 |
| 1f6bA  | 69.77     | 8.31  | 1.04 | 6.08   | 0.24 | 55.56    | 1.39 | 1.56 | 19.26  | 0.08 | 65.49         | 25.76 | 1.16 | 7.08   | 0.4  | 68.77      | 51.25 | 0.99 | 2.17   | 0.58 |
| 1smxA  | 72.73     | 4.65  | 0.58 | 7.19   | 0.18 | 73.33    | 6.4  | 0.79 | 4.99   | 0.21 | 50.77         | 38.37 | 2.91 | 2.13   | 0.42 | 81.82      | 73.26 | 0.36 | 1.15   | 0.76 |
| 1atlA  | 52        | 2.87  | 2.18 | 10.73  | 0.12 | 50       | 0.44 | 0.51 | 34.77  | 0.05 | 53.73         | 7.95  | 0.91 | 14.76  | 0.2  | 79.4       | 58.72 | 0.34 | 1.44   | 0.68 |
| 1jo8A  | 100       | 10.24 | 0    | 3.69   | 0.31 | 100      | 3.15 | 0    | 8.91   | 0.17 | 78.57         | 69.29 | 0.35 | 0.61   | 0.71 | 82.91      | 76.38 | 0.15 | 0.8    | 0.78 |
| 1ag6A  | 88.24     | 6.33  | 0.09 | 11.18  | 0.23 | 100      | 1.69 | 0    | 24.87  | 0.13 | 66.38         | 32.49 | 0.85 | 4.99   | 0.44 | 67.47      | 70.89 | 0.58 | 1.08   | 0.67 |
| 1ctfA  | 88.89     | 6.35  | 0.06 | 7.05   | 0.23 | 100      | 2.38 | 0    | 12.61  | 0.15 | 82.14         | 36.51 | 0.25 | 1.84   | 0.53 | 79.41      | 85.71 | 0.24 | 0.49   | 0.81 |
| 1vp6A  | 87.93     | 18.48 | 0.3  | 6.8    | 0.4  | 90       | 3.26 | 1.18 | 18.31  | 0.17 | 78.87         | 55.43 | 0.3  | 2.91   | 0.65 | 51.33      | 63.04 | 3.31 | 1.4    | 0.55 |
| 1avsA  | 64.71     | 12.5  | 0.71 | 5.4    | 0.28 | 75       | 3.41 | 0.45 | 15.56  | 0.16 | 63.83         | 34.09 | 0.77 | 3.01   | 0.45 | 60.19      | 70.45 | 0.83 | 0.88   | 0.64 |
| 1ckeA  | 80.49     | 16.58 | 0.72 | 4.58   | 0.36 | 100      | 2.76 | 0    | 17     | 0.16 | 68.22         | 44.22 | 0.7  | 2.29   | 0.54 | 72.33      | 78.14 | 1.14 | 0.82   | 0.75 |
| 1i1jA  | 71.43     | 5.88  | 1.98 | 7.92   | 0.2  | 33.33    | 0.39 | 3.48 | 38.26  | 0.03 | 74.42         | 25.1  | 0.91 | 6.2    | 0.42 | 77.65      | 54.51 | 0.45 | 2.44   | 0.64 |
| 1i1nA  | 74.75     | 12.98 | 0.74 | 4.47   | 0.31 | 100      | 1.05 | 0    | 35.57  | 0.1  | 62.71         | 39.82 | 1.4  | 4.98   | 0.49 | 71.93      | 47.19 | 0.74 | 4.71   | 0.57 |
| 1fx2A  | 76        | 13.29 | 1.9  | 6.02   | 0.31 | 64.29    | 6.29 | 0.67 | 8.87   | 0.2  | 62.14         | 44.76 | 0.92 | 3.6    | 0.52 | 50.3       | 59.44 | 3.63 | 2.26   | 0.53 |
| 1c9oA  | 100       | 5.16  | 0    | 9.76   | 0.22 | 70       | 4.52 | 2.15 | 6.61   | 0.16 | 85.58         | 57.42 | 0.18 | 1.27   | 0.68 | 82.35      | 72.26 | 0.21 | 1.25   | 0.75 |
| 1ne2A  | 74.55     | 9.36  | 1.7  | 15.09  | 0.26 | 80       | 2.74 | 1.5  | 25.58  | 0.14 | 57.02         | 31.51 | 1.58 | 8.43   | 0.41 | 82.75      | 59.13 | 0.41 | 3.27   | 0.69 |
| 1mk0A  | 87.5      | 3.87  | 0.56 | 11     | 0.18 | 72.22    | 7.18 | 1.12 | 8.49   | 0.22 | 69.77         | 33.15 | 0.67 | 7.18   | 0.47 | 71.79      | 61.88 | 0.43 | 3.23   | 0.65 |
| 1cjlA  | 72.31     | 13.47 | 0.52 | 8.43   | 0.31 | 60       | 2.58 | 0.42 | 12.75  | 0.12 | 70.55         | 32.95 | 0.51 | 5.51   | 0.47 | 73.91      | 68.19 | 0.35 | 2.87   | 0.7  |
| 1kq6A  | 58.33     | 6.42  | 1.48 | 14.38  | 0.19 | 33.33    | 0.46 | 1.52 | 42.48  | 0.04 | 75.41         | 21.1  | 0.48 | 12.46  | 0.39 | 73.01      | 54.59 | 0.32 | 4.33   | 0.62 |
| 1c44A  | 50        | 1.21  | 4.58 | 14.91  | 0.07 | 100      | 0.4  | 0    | 47.87  | 0.06 | 73.02         | 18.62 | 0.55 | 7.32   | 0.36 | 71.9       | 70.45 | 0.66 | 1.02   | 0.7  |
| 1bkrA  | 71.43     | 3.16  | 0.19 | 12.69  | 0.15 | 65.52    | 12   | 0.92 | 5.94   | 0.27 | 76.32         | 18.35 | 0.31 | 3.93   | 0.37 | 70.3       | 73.42 | 0.4  | 0.69   | 0.71 |
| 1gmiA  | 93.75     | 8.93  | 0.12 | 10.98  | 0.28 | 33.33    | 0.3  | 4.56 | 42.96  | 0.03 | 87.41         | 37.2  | 0.13 | 2.96   | 0.56 | 80.58      | 74.11 | 0.23 | 1.06   | 0.76 |
| 1chdA  | 80.68     | 12.63 | 0.57 | 3.89   | 0.31 | 85.71    | 1.07 | 0.23 | 34.24  | 0.09 | 71.93         | 43.77 | 0.68 | 2.41   | 0.55 | 65.79      | 70.82 | 0.83 | 0.91   | 0.67 |
| 1abaA  | 60        | 6.43  | 0.77 | 5.62   | 0.19 | 85.71    | 4.29 | 0.03 | 8.37   | 0.19 | 73.4          | 49.29 | 0.44 | 3.32   | 0.59 | 73.03      | 79.29 | 0.33 | 0.41   | 0.75 |
| 1jyhA  | 75        | 5.68  | 0.14 | 8.52   | 0.2  | 83.33    | 4.73 | 0.09 | 8.68   | 0.19 | 73.26         | 43.22 | 0.97 | 6.5    | 0.55 | 69.21      | 74.45 | 0.73 | 0.69   | 0.71 |
| 2mhrA  | 72.22     | 8.84  | 1.73 | 7.91   | 0.25 | 100      | 1.36 | 0    | 39.9   | 0.12 | 78.72         | 25.17 | 0.56 | 11.46  | 0.44 | 64.81      | 47.62 | 1.73 | 1.59   | 0.55 |
| 3dqgA  | 80        | 9.73  | 1.2  | 4.89   | 0.27 | 87.5     | 2.13 | 0.01 | 28.66  | 0.13 | 80.65         | 37.99 | 0.29 | 3.48   | 0.54 | 67.76      | 75.38 | 0.89 | 1.28   | 0.7  |

|       |       |       |      |       |      |       |      |      |       |      |       |       |      |       |      |       |       |      |       |      |
|-------|-------|-------|------|-------|------|-------|------|------|-------|------|-------|-------|------|-------|------|-------|-------|------|-------|------|
| lrybA | 75.95 | 13.19 | 0.55 | 3.37  | 0.31 | 85.71 | 5.27 | 0.18 | 9.98  | 0.21 | 80.57 | 30.77 | 0.42 | 2.76  | 0.49 | 74.9  | 81.76 | 0.38 | 0.69  | 0.78 |
| lroaA | 80    | 1.61  | 0.02 | 15.41 | 0.11 | 64    | 6.45 | 2.71 | 7.66  | 0.19 | 70.33 | 25.81 | 0.6  | 3.76  | 0.41 | 73.43 | 80.24 | 0.55 | 0.59  | 0.76 |
| lm8aA | 100   | 3.16  | 0    | 14.26 | 0.17 | 60    | 9.47 | 0.6  | 3.2   | 0.22 | 74.19 | 48.42 | 0.37 | 2.18  | 0.58 | 79.31 | 72.63 | 0.18 | 0.68  | 0.74 |
| la6mA | 75    | 4.5   | 0.85 | 10.36 | 0.18 | 33.33 | 1    | 2.52 | 32.44 | 0.05 | 87.23 | 20.5  | 0.15 | 6.37  | 0.42 | 68.28 | 77.5  | 0.49 | 0.46  | 0.72 |
| lxkrA | 50    | 1.62  | 4.23 | 14.27 | 0.09 | 16.67 | 1.85 | 7.77 | 10.95 | 0.05 | 69.84 | 10.19 | 0.72 | 26.11 | 0.26 | 59.02 | 72.69 | 2.22 | 0.53  | 0.65 |
| 2tpsA | 68.37 | 12.76 | 0.96 | 5.42  | 0.29 | 80    | 2.29 | 0.32 | 15.39 | 0.13 | 72.16 | 45.71 | 0.59 | 3.28  | 0.57 | 73    | 72.95 | 0.46 | 2.33  | 0.72 |
| leazA | 92.59 | 11.9  | 0.13 | 3.31  | 0.32 | 90    | 4.29 | 0.08 | 13.07 | 0.19 | 73.61 | 50.48 | 1.33 | 2.71  | 0.6  | 84.69 | 79.05 | 0.14 | 0.62  | 0.81 |
| ljbkA | 37.93 | 3.1   | 3.33 | 12.1  | 0.1  | 64.71 | 3.1  | 1.63 | 14.3  | 0.14 | 72.62 | 17.18 | 0.74 | 10.79 | 0.35 | 73.2  | 63.1  | 0.66 | 1.01  | 0.67 |
| lej0A | 69.23 | 6.51  | 0.95 | 5.32  | 0.21 | 80    | 2.89 | 0.13 | 11.63 | 0.15 | 70.87 | 35.18 | 0.54 | 2.49  | 0.49 | 75.06 | 71.08 | 0.37 | 1.02  | 0.72 |
| ljfxA | 70.27 | 9.58  | 0.66 | 7.29  | 0.25 | 80    | 0.74 | 0.03 | 41.12 | 0.08 | 70.92 | 32.78 | 0.66 | 4.04  | 0.47 | 71.95 | 68.51 | 0.6  | 1.66  | 0.69 |
| ljo0A | 57.14 | 2.55  | 0.37 | 9.25  | 0.12 | 50    | 0.64 | 0.63 | 23.6  | 0.05 | 76.67 | 29.3  | 0.32 | 4.6   | 0.46 | 65.02 | 84.08 | 0.54 | 0.61  | 0.73 |
| lgbsA | 66.67 | 12.31 | 1.49 | 18.09 | 0.28 | 72    | 4.62 | 0.82 | 17.01 | 0.18 | 68.22 | 22.56 | 0.8  | 15.81 | 0.38 | 71.01 | 37.69 | 0.81 | 11.19 | 0.51 |
| ldsxA | 42.86 | 2.17  | 1.99 | 9.52  | 0.09 | 46.15 | 4.35 | 2.48 | 8.11  | 0.13 | 86.21 | 18.12 | 0.23 | 6.67  | 0.39 | 78.12 | 54.35 | 0.53 | 2.6   | 0.64 |
| lpkoA | 76.32 | 9.6   | 0.27 | 6.25  | 0.26 | 100   | 0.66 | 0    | 33.43 | 0.08 | 75.12 | 51.99 | 0.58 | 2.73  | 0.61 | 74.04 | 69.87 | 0.43 | 1.71  | 0.71 |
| 2cuaA | 83.33 | 7.99  | 0.43 | 10.48 | 0.25 | 100   | 2.24 | 0    | 18.65 | 0.15 | 80.51 | 30.35 | 0.35 | 8.85  | 0.48 | 80    | 61.34 | 0.25 | 5.91  | 0.69 |
| lqt9A | 61.22 | 8.57  | 1.32 | 6.41  | 0.22 | 76.92 | 2.86 | 0.19 | 19.59 | 0.15 | 60.87 | 32    | 0.76 | 3.8   | 0.43 | 71.88 | 70.86 | 0.43 | 0.98  | 0.71 |
| lk6kA | 78.95 | 6.49  | 0.23 | 5.16  | 0.22 | 60    | 2.6  | 2.04 | 12.51 | 0.12 | 86.21 | 21.65 | 0.25 | 6.24  | 0.43 | 71.76 | 67.1  | 0.59 | 0.92  | 0.69 |
| lg9oA | 93.33 | 7.57  | 0.1  | 7.3   | 0.26 | 87.5  | 3.78 | 0.36 | 12.09 | 0.18 | 68.97 | 43.24 | 1.56 | 1.67  | 0.53 | 78.89 | 76.76 | 0.28 | 0.51  | 0.77 |
| li71A | 75    | 3.37  | 0.47 | 8.53  | 0.15 | 100   | 2.81 | 0    | 10.69 | 0.16 | 77.08 | 20.79 | 0.45 | 3.83  | 0.38 | 67.02 | 35.39 | 1.25 | 3.08  | 0.47 |
| lfcyA | 41.94 | 3.44  | 2.88 | 21.18 | 0.12 | 4.26  | 1.59 | 8.39 | 29.65 | 0.02 | 77.5  | 8.2   | 0.55 | 25.28 | 0.25 | 80.95 | 44.97 | 0.22 | 7.47  | 0.6  |
| lfl0A | 67.27 | 8.79  | 0.98 | 13.7  | 0.24 | 90.48 | 4.51 | 0.21 | 17.67 | 0.2  | 64.06 | 29.22 | 1.1  | 11.8  | 0.42 | 75.78 | 63.18 | 0.36 | 2.5   | 0.68 |
| lvmbA | 79.17 | 9.55  | 0.14 | 3.51  | 0.27 | 100   | 1.51 | 0    | 15.19 | 0.12 | 81.25 | 38.69 | 0.55 | 2.03  | 0.55 | 75.11 | 87.44 | 0.22 | 0.25  | 0.8  |
| ltifA | 88.89 | 6.9   | 1.18 | 4.75  | 0.24 | 100   | 6.03 | 0    | 6.08  | 0.24 | 78.33 | 40.52 | 0.5  | 1.73  | 0.55 | 76.38 | 83.62 | 0.27 | 0.38  | 0.79 |
| lim5A | 69.49 | 9.36  | 1.93 | 6.87  | 0.25 | 100   | 4.11 | 0    | 19.65 | 0.2  | 73.27 | 33.79 | 0.95 | 5.02  | 0.49 | 74.76 | 71.69 | 0.36 | 0.85  | 0.72 |
| li5gA | 57.14 | 8     | 0.7  | 10.19 | 0.21 | 75    | 2    | 0.48 | 18.05 | 0.12 | 62.5  | 33.33 | 0.55 | 7.5   | 0.44 | 53.33 | 50.67 | 1.3  | 3.8   | 0.5  |
| lk7jA | 69.86 | 9.66  | 0.68 | 5.86  | 0.25 | 75    | 0.57 | 1.27 | 41.87 | 0.06 | 74.5  | 28.22 | 0.61 | 4.47  | 0.45 | 66.18 | 77.46 | 0.76 | 0.7   | 0.71 |
| lh98A | 70    | 5.11  | 0.49 | 11.4  | 0.18 | 38.1  | 5.84 | 2.27 | 9.06  | 0.13 | 53.57 | 21.9  | 1.05 | 5.2   | 0.32 | 59.3  | 37.23 | 0.65 | 6.67  | 0.45 |
| lpchA | 90.48 | 10.27 | 0.04 | 4.48  | 0.3  | 76.92 | 10.8 | 0.48 | 3.81  | 0.28 | 79.09 | 47.03 | 0.63 | 2.29  | 0.59 | 73.47 | 77.84 | 0.32 | 0.82  | 0.74 |
| latzA | 81.82 | 7.5   | 0.32 | 5.62  | 0.24 | 88.89 | 6.67 | 0.15 | 6.9   | 0.24 | 80    | 30    | 0.28 | 3.08  | 0.48 | 67.18 | 73.33 | 0.69 | 0.6   | 0.69 |
| lwhiA | 88    | 6.71  | 0.17 | 7.88  | 0.24 | 92.31 | 3.66 | 0.02 | 7.96  | 0.18 | 78.46 | 31.1  | 0.58 | 4.14  | 0.48 | 79.56 | 66.46 | 0.3  | 1.33  | 0.71 |
| lm4jA | 33.33 | 0.77  | 4.55 | 15.71 | 0.05 | 47.37 | 3.47 | 3.22 | 10.34 | 0.12 | 63.72 | 27.8  | 0.71 | 6.53  | 0.41 | 68.08 | 68.34 | 0.45 | 0.87  | 0.67 |
| lh2eA | 80    | 18.38 | 0.4  | 3.8   | 0.38 | 92.31 | 5.25 | 0.02 | 19.49 | 0.22 | 73.99 | 44.2  | 0.46 | 2.14  | 0.56 | 73.25 | 75.27 | 0.35 | 0.95  | 0.74 |
| lj3aA | 79.17 | 7.57  | 0.57 | 11.99 | 0.24 | 85.71 | 4.78 | 0.23 | 15    | 0.2  | 73.56 | 25.5  | 0.85 | 3.54  | 0.42 | 62.86 | 52.59 | 3.11 | 2.36  | 0.56 |
| ld4oA | 52.08 | 6.19  | 2.91 | 7.12  | 0.17 | 71.43 | 1.24 | 0.23 | 28.72 | 0.09 | 71.19 | 10.4  | 1.08 | 11.39 | 0.27 | 67.86 | 61.14 | 1.72 | 1.69  | 0.63 |
| lej8A | 56.52 | 3.51  | 2.17 | 11.1  | 0.13 | 100   | 0.81 | 0    | 30.09 | 0.09 | 56.99 | 28.65 | 1.57 | 3.46  | 0.39 | 70.34 | 50    | 1    | 3.63  | 0.58 |
| lhtwA | 86.36 | 11.34 | 0.11 | 3.88  | 0.31 | 87.5  | 4.18 | 0.07 | 16.54 | 0.19 | 73.99 | 38.21 | 0.43 | 3.56  | 0.52 | 71.53 | 60    | 0.62 | 1.21  | 0.65 |
| lolzA | 79.31 | 18.4  | 0.32 | 2.96  | 0.38 | 68.97 | 4    | 0.41 | 10.53 | 0.16 | 69.45 | 48.2  | 0.59 | 1.66  | 0.57 | 78.47 | 78    | 0.36 | 0.71  | 0.78 |
| lvfyA | 100   | 5.5   | 0    | 7.27  | 0.23 | 58.33 | 6.42 | 2.05 | 4.34  | 0.18 | 49.21 | 28.44 | 1.91 | 2.01  | 0.35 | 68.92 | 46.79 | 0.91 | 1.96  | 0.55 |
| lcc8A | 100   | 8.03  | 0    | 5.63  | 0.28 | 81.82 | 6.57 | 0.5  | 5.66  | 0.22 | 76.11 | 62.77 | 0.52 | 0.9   | 0.67 | 74.32 | 80.29 | 0.57 | 0.62  | 0.76 |

|       |       |       |      |       |      |       |      |      |       |      |       |       |      |       |      |       |       |      |      |      |
|-------|-------|-------|------|-------|------|-------|------|------|-------|------|-------|-------|------|-------|------|-------|-------|------|------|------|
| lt8kA | 81.82 | 8.33  | 0.11 | 8.01  | 0.25 | 66.67 | 1.85 | 0.41 | 22.71 | 0.11 | 91.67 | 20.37 | 0.1  | 3.61  | 0.42 | 74.29 | 72.22 | 0.35 | 0.99 | 0.72 |
| lbebA | 41.67 | 1.31  | 3.9  | 14.22 | 0.07 | 34.04 | 4.19 | 4.3  | 8.69  | 0.11 | 68.54 | 31.94 | 0.77 | 7.04  | 0.46 | 67.04 | 63.35 | 0.95 | 1.66 | 0.64 |
| llm4A | 76    | 12.39 | 0.54 | 7     | 0.3  | 80    | 0.87 | 0.2  | 31.77 | 0.08 | 55.74 | 22.17 | 1.36 | 5.97  | 0.34 | 62.35 | 55.43 | 1    | 2.93 | 0.58 |
| ljvwA | 86.15 | 16.05 | 0.18 | 4.15  | 0.37 | 90    | 2.58 | 0.06 | 17.8  | 0.15 | 71.13 | 57.88 | 0.67 | 2.37  | 0.63 | 76.06 | 71.92 | 0.29 | 1.67 | 0.73 |
| la3aA | 90.74 | 15.08 | 0.2  | 4.52  | 0.36 | 100   | 3.08 | 0    | 15.44 | 0.17 | 77.93 | 34.77 | 0.39 | 3.63  | 0.51 | 67.41 | 74.46 | 0.76 | 0.9  | 0.7  |
| la70A | 81.25 | 5.91  | 0.21 | 10.67 | 0.21 | 58.33 | 3.18 | 0.39 | 14.11 | 0.13 | 78.64 | 36.82 | 0.49 | 3.55  | 0.52 | 71.36 | 66.82 | 0.35 | 2.24 | 0.67 |
| lkidA | 71.43 | 5.76  | 1.54 | 8     | 0.2  | 66.67 | 0.46 | 0.11 | 39.25 | 0.05 | 84.62 | 17.74 | 0.62 | 9.18  | 0.38 | 69.81 | 75.12 | 0.63 | 1.83 | 0.72 |
| lhxnA | 51.52 | 3.31  | 3.79 | 32.69 | 0.13 | 19.33 | 10.1 | 6.4  | 13.64 | 0.12 | 74.4  | 24.32 | 0.61 | 15.86 | 0.42 | 74.73 | 54.09 | 0.57 | 2.93 | 0.63 |
| lxyA  | 90.91 | 7.63  | 0.08 | 7.04  | 0.26 | 100   | 3.82 | 0    | 9.59  | 0.19 | 79.25 | 32.06 | 0.39 | 3.06  | 0.49 | 85.05 | 69.47 | 0.25 | 1.54 | 0.76 |
| lvjkA | 88.24 | 7.81  | 0.6  | 7.55  | 0.25 | 100   | 1.56 | 0    | 13.05 | 0.12 | 89.23 | 30.21 | 0.17 | 4.08  | 0.51 | 80.34 | 74.48 | 0.36 | 0.75 | 0.76 |
| lg2rA | 80    | 7.55  | 0.56 | 5.36  | 0.24 | 100   | 1.89 | 0    | 14.95 | 0.13 | 78.05 | 20.13 | 0.42 | 4.28  | 0.39 | 76.22 | 78.62 | 0.35 | 0.61 | 0.76 |
| lsvyA | 70    | 3.12  | 2.11 | 11.56 | 0.14 | 58.82 | 4.46 | 1.96 | 9.12  | 0.15 | 70.42 | 21.88 | 0.63 | 6.31  | 0.38 | 81.5  | 62.5  | 0.22 | 2.09 | 0.7  |
| ldqgA | 28.57 | 0.58  | 6.42 | 18.81 | 0.04 | 31.4  | 7.8  | 4.38 | 11.5  | 0.14 | 45.89 | 19.36 | 2.35 | 13.06 | 0.28 | 77.13 | 49.71 | 0.6  | 3.16 | 0.61 |
| lguuA | 85.71 | 13.33 | 1.02 | 6.09  | 0.33 | 100   | 2.22 | 0    | 13.27 | 0.15 | 86.96 | 44.44 | 0.35 | 1.34  | 0.61 | 76.19 | 71.11 | 0.26 | 0.61 | 0.72 |
| lnpsA | 72.73 | 3.76  | 0.73 | 9.3   | 0.16 | 100   | 0.94 | 0    | 28.08 | 0.09 | 52.31 | 31.92 | 1.8  | 3.97  | 0.38 | 73.3  | 60.56 | 0.35 | 1.94 | 0.65 |
| lek0A | 65.57 | 10.1  | 0.62 | 7.11  | 0.25 | 75    | 2.27 | 0.59 | 21.36 | 0.13 | 77.08 | 28.03 | 0.39 | 4.3   | 0.46 | 75.22 | 65.91 | 0.62 | 0.8  | 0.7  |
| ldbxA | 76.19 | 4.03  | 0.5  | 10.26 | 0.17 | 80    | 4.03 | 0.33 | 14.35 | 0.17 | 78.29 | 34.51 | 0.34 | 3.87  | 0.51 | 73.18 | 65.99 | 0.48 | 2.06 | 0.68 |
| ljosA | 85    | 10.06 | 0.5  | 4.09  | 0.29 | 85.71 | 3.55 | 0.05 | 10.18 | 0.17 | 82.5  | 39.05 | 0.4  | 6.26  | 0.56 | 67.98 | 81.66 | 1.06 | 0.38 | 0.73 |
| ljfuA | 74.67 | 13.43 | 0.4  | 10.06 | 0.31 | 100   | 1.2  | 0    | 33.81 | 0.11 | 68.4  | 37.89 | 0.51 | 7.31  | 0.5  | 71.82 | 56.83 | 0.39 | 4.12 | 0.63 |
| lc52A | 42.86 | 2.54  | 1.78 | 18.96 | 0.1  | 40    | 2.54 | 2.95 | 19.98 | 0.09 | 59.09 | 16.53 | 0.98 | 6.01  | 0.3  | 80.18 | 37.71 | 0.28 | 3.39 | 0.54 |
| lhfcA | 70.83 | 5.01  | 0.97 | 9.15  | 0.18 | 100   | 0.29 | 0    | 68.1  | 0.05 | 67.74 | 12.39 | 0.79 | 8.66  | 0.28 | 76.6  | 53.1  | 0.43 | 2.27 | 0.63 |
| ldixA | 34.62 | 2.06  | 5.25 | 17.06 | 0.08 | 62.5  | 1.15 | 4.05 | 27.27 | 0.08 | 70.67 | 12.16 | 0.46 | 12.44 | 0.29 | 69.12 | 53.9  | 0.68 | 1.98 | 0.6  |
| lmugA | 66.67 | 3.97  | 0.86 | 8.73  | 0.16 | 48.39 | 4.25 | 1.5  | 6.9   | 0.14 | 86.15 | 15.86 | 0.14 | 8.53  | 0.36 | 66.25 | 60.06 | 0.68 | 1.47 | 0.62 |
| lh0pA | 76.92 | 11.86 | 0.43 | 4.92  | 0.29 | 82.61 | 3.75 | 0.13 | 12.63 | 0.17 | 63.8  | 41.11 | 0.81 | 3.6   | 0.5  | 78.04 | 66.01 | 0.29 | 2.2  | 0.71 |
| lkw4A | 83.33 | 6.25  | 0.78 | 5.27  | 0.22 | 100   | 5    | 0    | 9.15  | 0.22 | 66.67 | 27.5  | 0.5  | 2.49  | 0.41 | 76.83 | 78.75 | 0.22 | 0.32 | 0.77 |
| lcznA | 77.19 | 10.84 | 0.8  | 10.85 | 0.28 | 90    | 2.22 | 0.24 | 20.8  | 0.14 | 72.96 | 35.22 | 0.76 | 9.93  | 0.5  | 60.71 | 54.43 | 1.23 | 3.52 | 0.56 |
| li58A | 56.47 | 13.33 | 1.95 | 7.52  | 0.27 | 30    | 0.83 | 2.94 | 29.8  | 0.05 | 73.49 | 33.89 | 0.54 | 3.08  | 0.49 | 65.56 | 49.17 | 3.56 | 1.66 | 0.56 |
| lh4xA | 60    | 7.73  | 1.43 | 9.63  | 0.21 | 71.43 | 5.15 | 0.47 | 11.11 | 0.19 | 65.57 | 41.24 | 0.46 | 3.96  | 0.51 | 59.49 | 72.68 | 0.85 | 0.56 | 0.64 |
| lbsgA | 74.31 | 12.37 | 0.62 | 4.49  | 0.3  | 76    | 2.9  | 0.67 | 21.15 | 0.15 | 76.7  | 32.67 | 0.4  | 5.59  | 0.49 | 73.81 | 61.53 | 0.59 | 1.73 | 0.67 |
| lfvgA | 73.49 | 13.26 | 0.38 | 6.89  | 0.31 | 85.71 | 2.61 | 0.07 | 16.35 | 0.15 | 62.59 | 38.91 | 0.99 | 6.23  | 0.48 | 66.44 | 63.7  | 0.64 | 2.11 | 0.64 |
| 3borA | 72.22 | 11.9  | 1.18 | 4.39  | 0.29 | 87.5  | 1.6  | 1.21 | 40.02 | 0.12 | 77.46 | 30.66 | 0.43 | 3.56  | 0.48 | 75.87 | 64.76 | 0.33 | 1.05 | 0.69 |
| lfvkA | 65.38 | 10.33 | 1.45 | 14.14 | 0.26 | 100   | 0.3  | 0    | 58.33 | 0.05 | 68.21 | 31.31 | 0.7  | 8.74  | 0.46 | 63.86 | 62.31 | 1.39 | 1.25 | 0.62 |
| lvhuA | 71.21 | 9.77  | 0.73 | 4.3   | 0.26 | 75    | 1.25 | 0.57 | 17.54 | 0.09 | 68.69 | 42.41 | 0.74 | 2.08  | 0.53 | 64.72 | 73.6  | 0.65 | 0.6  | 0.68 |
| lku3A | 80    | 14.04 | 0.33 | 4.42  | 0.33 | 77.78 | 12.3 | 0.37 | 4.51  | 0.3  | 67.44 | 50.88 | 0.51 | 1.04  | 0.57 | 75.38 | 85.96 | 0.43 | 0.21 | 0.8  |
| lr26A | 70.73 | 14.57 | 0.7  | 4.54  | 0.31 | 100   | 1.01 | 0    | 37.47 | 0.1  | 74.22 | 47.74 | 0.39 | 2.92  | 0.58 | 70.56 | 81.91 | 0.36 | 0.51 | 0.75 |
| lfqtA | 82.86 | 10.32 | 0.14 | 4.85  | 0.28 | 75    | 2.14 | 0.04 | 24.69 | 0.12 | 76.47 | 50.89 | 0.32 | 2.24  | 0.61 | 71.13 | 71.89 | 0.54 | 1.06 | 0.7  |
| ld1qA | 68.52 | 10.48 | 0.54 | 4.63  | 0.26 | 76.19 | 4.53 | 0.08 | 8.87  | 0.18 | 72.35 | 34.84 | 0.46 | 2.53  | 0.49 | 68.42 | 77.34 | 0.57 | 0.56 | 0.72 |
| lp90A | 60    | 4.71  | 2.67 | 7.82  | 0.16 | 75    | 2.35 | 0.32 | 15.54 | 0.13 | 62.5  | 29.41 | 1.02 | 4.81  | 0.41 | 71.64 | 75.29 | 0.45 | 1.39 | 0.72 |
| lbehA | 69.23 | 3.77  | 0.95 | 15.11 | 0.16 | 66.67 | 1.26 | 0.76 | 19.88 | 0.09 | 76.72 | 18.45 | 0.59 | 12.61 | 0.37 | 63.16 | 52.62 | 1.09 | 3.31 | 0.57 |

|             |              |             |             |             |             |              |             |             |              |             |              |              |             |             |             |              |              |             |             |             |
|-------------|--------------|-------------|-------------|-------------|-------------|--------------|-------------|-------------|--------------|-------------|--------------|--------------|-------------|-------------|-------------|--------------|--------------|-------------|-------------|-------------|
| 2arcA       | 47.62        | 2.87        | 4.58        | 21.05       | 0.11        | 43.75        | 2.01        | 4.57        | 23.27        | 0.09        | 64.36        | 18.68        | 0.82        | 20.02       | 0.34        | 78.01        | 62.93        | 0.4         | 4.91        | 0.69        |
| 1jwqA       | 91.49        | 18.78       | 0.07        | 2.91        | 0.41        | 100          | 1.75        | 0           | 18.55        | 0.13        | 76.33        | 50           | 0.47        | 1.46        | 0.61        | 82.01        | 74.67        | 0.28        | 0.65        | 0.78        |
| 1tqgA       | 72.73        | 13.33       | 0.77        | 5.21        | 0.31        | 75           | 5           | 0.69        | 16.56        | 0.19        | 81.25        | 43.33        | 0.24        | 1.91        | 0.59        | 76.64        | 87.5         | 0.41        | 0.26        | 0.81        |
| 1kqrA       | 36.84        | 1.59        | 8.95        | 16.84       | 0.07        | 20           | 0.91        | 7.29        | 17.54        | 0.04        | 51.75        | 13.15        | 2.09        | 26.37       | 0.25        | 57.37        | 48.3         | 1.77        | 2.88        | 0.51        |
| 1iibA       | 86.67        | 6.5         | 0.15        | 6.61        | 0.23        | 69.57        | 8           | 1.05        | 4.6          | 0.23        | 66.67        | 41           | 0.63        | 2.76        | 0.51        | 68.88        | 83           | 0.49        | 0.34        | 0.74        |
| 1iwdA       | 76           | 13.87       | 0.66        | 4.06        | 0.32        | 100          | 0.91        | 0           | 32.38        | 0.09        | 66.22        | 35.77        | 1.07        | 2.73        | 0.48        | 77.8         | 61.86        | 0.4         | 1.28        | 0.69        |
| 1aapA       | 100          | 5.26        | 0           | 6.31        | 0.22        | 100          | 0.88        | 0           | 10.99        | 0.09        | 84.62        | 38.6         | 0.37        | 3.2         | 0.55        | 83.78        | 54.39        | 0.14        | 1.42        | 0.65        |
| 1qipA       | 86.36        | 9.72        | 0.08        | 5.38        | 0.28        | 100          | 3.07        | 0           | 28.44        | 0.17        | 83.01        | 43.73        | 0.36        | 9.65        | 0.59        | 92.88        | 72.89        | 0.12        | 1.29        | 0.82        |
| 5ptpA       | 81.56        | 17.61       | 0.22        | 2.98        | 0.37        | 100          | 0.92        | 0           | 33.65        | 0.09        | 71.13        | 52.83        | 0.58        | 1.73        | 0.6         | 83.66        | 58.04        | 0.24        | 1.55        | 0.69        |
| 1rw7A       | 76.12        | 8.42        | 0.78        | 5.89        | 0.25        | 50           | 0.66        | 1.74        | 32.82        | 0.06        | 77.45        | 35.15        | 0.44        | 4.64        | 0.51        | 65.63        | 69.97        | 0.87        | 1.63        | 0.67        |
| 1xdzA       | 77.38        | 11.95       | 0.62        | 6.55        | 0.3         | 76.47        | 2.39        | 0.47        | 21.78        | 0.13        | 68.42        | 38.05        | 0.85        | 5.03        | 0.5         | 70.19        | 69.49        | 0.51        | 2.94        | 0.69        |
| 2vxnA       | 70.9         | 16.87       | 0.96        | 3.65        | 0.34        | 76.92        | 1.78        | 2.63        | 28.51        | 0.12        | 62.16        | 44.94        | 1.18        | 1.86        | 0.52        | 66.67        | 72.82        | 0.97        | 1.23        | 0.69        |
| 1dmgA       | 60.53        | 6.99        | 1.96        | 12.28       | 0.2         | 55.56        | 1.52        | 3.66        | 33.69        | 0.09        | 69.3         | 24.01        | 0.92        | 11.05       | 0.4         | 74.41        | 76.9         | 0.4         | 0.5         | 0.75        |
| 1brfA       | 100          | 3.3         | 0           | 10.62       | 0.17        | 100          | 7.69        | 0           | 8.91         | 0.27        | 55.56        | 43.96        | 1.26        | 1.34        | 0.46        | 82.54        | 57.14        | 0.25        | 4.61        | 0.67        |
| 1fk5A       | 66.67        | 1.43        | 0.96        | 17.58       | 0.09        | 40           | 4.29        | 5.27        | 5.42         | 0.12        | 40.35        | 16.43        | 2.69        | 5.96        | 0.24        | 70.08        | 63.57        | 0.54        | 0.85        | 0.66        |
| 2hs1A       | 60           | 5.71        | 0.9         | 3.72        | 0.17        | 18.67        | 6.67        | 6.54        | 3.68         | 0.09        | 100          | 0.48         | 0           | 34.92       | 0.07        | 78.75        | 60           | 0.32        | 1.32        | 0.67        |
| 1gz2A       | 67.39        | 9.31        | 0.35        | 4.19        | 0.24        | 100          | 1.2         | 0           | 26.86        | 0.11        | 72.96        | 34.83        | 0.69        | 2.87        | 0.49        | 69.84        | 66.07        | 0.53        | 1.19        | 0.67        |
| 1lo7A       | 75.93        | 14.29       | 1.64        | 5.29        | 0.32        | 71.43        | 8.71        | 2.27        | 7.23         | 0.24        | 79.08        | 54.01        | 0.72        | 2.44        | 0.64        | 77.08        | 90.24        | 0.24        | 0.44        | 0.83        |
| 1lpyA       | 58.33        | 11.81       | 1.01        | 6.24        | 0.26        | 80           | 1.69        | 0.03        | 25.41        | 0.11        | 42.86        | 21.52        | 1.96        | 7.39        | 0.29        | 58.53        | 63.71        | 0.82        | 1.09        | 0.6         |
| 1jl1A       | 76.92        | 11.56       | 0.19        | 4.38        | 0.29        | 100          | 2.02        | 0           | 16.85        | 0.14        | 75.33        | 32.66        | 0.3         | 2.82        | 0.49        | 76.99        | 72.54        | 0.42        | 0.87        | 0.74        |
| 1ihzA       | 73.81        | 10.03       | 0.74        | 4.98        | 0.26        | 75           | 1.94        | 0.74        | 15.62        | 0.12        | 84.8         | 34.3         | 0.31        | 4.55        | 0.53        | 76.68        | 70.23        | 0.36        | 1.86        | 0.72        |
| 1xffA       | 81.71        | 9.6         | 0.82        | 5.08        | 0.28        | 77.27        | 4.87        | 0.94        | 8.84         | 0.19        | 63.66        | 37.39        | 1.12        | 3.17        | 0.48        | 81.32        | 72.35        | 0.33        | 0.65        | 0.76        |
| 1jbeA       | 87.72        | 20.24       | 0.24        | 3.01        | 0.41        | 92.86        | 5.26        | 0.12        | 10.39        | 0.22        | 75.66        | 57.89        | 0.35        | 1.5         | 0.65        | 72.7         | 83           | 0.37        | 0.46        | 0.77        |
| 1nrvA       | 77.78        | 6.7         | 0.23        | 8.81        | 0.22        | 88.89        | 3.83        | 0.15        | 15.92        | 0.18        | 79.27        | 31.1         | 0.39        | 7.12        | 0.48        | 81.63        | 57.42        | 0.16        | 2.7         | 0.67        |
| 1fnaA       | 74.07        | 9.95        | 0.43        | 6.74        | 0.26        | 100          | 1.49        | 0           | 19.07        | 0.12        | 72.55        | 55.22        | 0.35        | 1.2         | 0.61        | 71.27        | 64.18        | 1.32        | 0.91        | 0.66        |
| 1k7cA       | 78.57        | 7.45        | 1.15        | 9.65        | 0.24        | 100          | 1.35        | 0           | 27.06        | 0.12        | 69.91        | 25.55        | 0.59        | 8.27        | 0.42        | 71.14        | 47.55        | 1.28        | 2.96        | 0.57        |
| 1hh8A       | 65.26        | 19.25       | 4.5         | 12.3        | 0.35        | 100          | 2.8         | 0           | 25.64        | 0.17        | 72.16        | 43.48        | 2.53        | 10.74       | 0.55        | 69.91        | 46.89        | 0.78        | 11.37       | 0.57        |
| 1ql0A       | 71.43        | 7.34        | 1.99        | 10.66       | 0.22        | 76.92        | 1.63        | 0.19        | 40.17        | 0.11        | 75.8         | 19.41        | 0.72        | 10.6        | 0.38        | 74.44        | 48.45        | 0.52        | 4.18        | 0.59        |
| 1tzvA       | 67.44        | 15.26       | 0.47        | 5.16        | 0.32        | 100          | 2.63        | 0           | 32.06        | 0.16        | 80.37        | 45.26        | 0.23        | 2.09        | 0.6         | 66.67        | 76.84        | 0.46        | 0.59        | 0.71        |
| 1gmxA       | 86.11        | 14.29       | 0.5         | 3.79        | 0.34        | 85.71        | 2.76        | 0.57        | 12.88        | 0.15        | 62.57        | 53.92        | 0.97        | 1.74        | 0.56        | 68.14        | 64.06        | 0.64        | 1.21        | 0.65        |
| 1ktgA       | 58.7         | 8.68        | 0.74        | 8.46        | 0.22        | 83.33        | 1.61        | 0.44        | 29.58        | 0.11        | 55.08        | 33.12        | 1.59        | 4.51        | 0.41        | 69.69        | 71.7         | 0.6         | 0.68        | 0.7         |
| 1dlwA       | 68.75        | 7.43        | 0.61        | 7.3         | 0.22        | 76.92        | 6.76        | 0.39        | 9.51         | 0.22        | 65.17        | 39.19        | 1.06        | 3.37        | 0.5         | 69.68        | 72.97        | 0.54        | 0.47        | 0.71        |
| 1wjxA       | 74.29        | 11.21       | 0.54        | 3.79        | 0.28        | 90.91        | 4.31        | 0.18        | 7.9          | 0.19        | 73.84        | 54.74        | 0.54        | 1.9         | 0.62        | 72.64        | 66.38        | 1.29        | 0.99        | 0.68        |
| 1w0hA       | 71.11        | 14.78       | 0.72        | 4.89        | 0.32        | 60           | 0.69        | 0.97        | 29.98        | 0.06        | 68.33        | 37.88        | 0.84        | 3.42        | 0.5         | 64.73        | 66.97        | 0.85        | 1.44        | 0.65        |
| 1rw1A       | 56.52        | 7.39        | 0.93        | 5.97        | 0.2         | 56.25        | 5.11        | 0.54        | 7.04         | 0.16        | 69.44        | 56.82        | 0.89        | 1.46        | 0.62        | 66.82        | 83.52        | 0.58        | 0.34        | 0.74        |
| <b>Mean</b> | <b>72.83</b> | <b>8.78</b> | <b>1.08</b> | <b>8.32</b> | <b>0.24</b> | <b>75.22</b> | <b>3.20</b> | <b>1.03</b> | <b>20.05</b> | <b>0.14</b> | <b>71.61</b> | <b>34.19</b> | <b>0.73</b> | <b>5.63</b> | <b>0.47</b> | <b>72.08</b> | <b>66.88</b> | <b>0.67</b> | <b>1.78</b> | <b>0.68</b> |

\* excluding residue pairs with contact probability < 0.5 and excluding two targets (1tqhA and 1hdoA) for which RaptorX could not predict contact maps.

prec: precision, cov: coverage, m\_e: mean\_error



**Supplementary Table S2. Performance evaluation of different methods on PSICOV 148 targets\*\***

| Target | Pure threading | Contact-assisted threading |                |                     |                  |
|--------|----------------|----------------------------|----------------|---------------------|------------------|
|        |                | PSICOV assisted            | mfDCA assisted | metaPSICOV assisted | RaptorX assisted |
| 1bdoA  | 0.6214         | 0.6214                     | 0.5561         | 0.6214              | 0.7457           |
| 1aoeA  | 0.691          | 0.685                      | 0.6716         | 0.691               | 0.691            |
| 1jkxA  | 0.1388         | 0.1388                     | 0.1388         | 0.1388              | 0.7715           |
| 1i4jA  | 0.8116         | 0.688                      | 0.688          | 0.8116              | 0.8116           |
| 1wkcA  | 0.8286         | 0.8042                     | 0.7682         | 0.8286              | 0.8286           |
| 1d0qA  | 0.2279         | 0.2279                     | 0.1885         | 0.2279              | 0.3006           |
| 2phyA  | 0.6            | 0.5973                     | 0.5169         | 0.6                 | 0.6              |
| 1ny1A  | 0.7755         | 0.7112                     | 0.7228         | 0.7755              | 0.7755           |
| 1nb9A  | 0.7082         | 0.6845                     | 0.5936         | 0.7082              | 0.7082           |
| 1gzcA  | 0.6685         | 0.5482                     | 0.1806         | 0.6685              | 0.6685           |
| 1f6bA  | 0.7568         | 0.7568                     | 0.7568         | 0.7616              | 0.7672           |
| 1smxA  | 0.5112         | 0.5112                     | 0.4977         | 0.5119              | 0.5119           |
| 1atlA  | 0.8884         | 0.8018                     | 0.8526         | 0.8884              | 0.8884           |
| 1jo8A  | 0.8646         | 0.8529                     | 0.8529         | 0.8646              | 0.871            |
| 1ag6A  | 0.6476         | 0.6476                     | 0.6476         | 0.6476              | 0.7251           |
| 1ctfA  | 0.4481         | 0.3655                     | 0.3655         | 0.3951              | 0.409            |
| 1vp6A  | 0.7483         | 0.6082                     | 0.6082         | 0.6082              | 0.7979           |
| 1avsA  | 0.649          | 0.5565                     | 0.5565         | 0.5981              | 0.5981           |
| 1ckeA  | 0.3744         | 0.3691                     | 0.313          | 0.3744              | 0.3744           |
| 1iljA  | 0.5039         | 0.5026                     | 0.5016         | 0.5026              | 0.5585           |
| 1i1nA  | 0.4896         | 0.4866                     | 0.4622         | 0.4866              | 0.4896           |
| 1fx2A  | 0.6083         | 0.6075                     | 0.5261         | 0.6083              | 0.6083           |
| 1c9oA  | 0.1979         | 0.1968                     | 0.2028         | 0.5422              | 0.5422           |

|       |        |        |        |        |        |
|-------|--------|--------|--------|--------|--------|
| 1ne2A | 0.6859 | 0.6859 | 0.662  | 0.6859 | 0.5423 |
| 1mk0A | 0.1767 | 0.4732 | 0.2403 | 0.5342 | 0.5795 |
| 1cjwA | 0.618  | 0.1098 | 0.1098 | 0.5733 | 0.6535 |
| 1kq6A | 0.6875 | 0.6469 | 0.6469 | 0.6875 | 0.6982 |
| 1c44A | 0.6543 | 0.3288 | 0.1894 | 0.6257 | 0.6543 |
| 1bkrA | 0.7785 | 0.7434 | 0.7434 | 0.7785 | 0.7785 |
| 1gmiA | 0.7138 | 0.7002 | 0.6277 | 0.7138 | 0.7475 |
| 1chdA | 0.3142 | 0.3142 | 0.1634 | 0.3142 | 0.3142 |
| 1abaA | 0.5671 | 0.5173 | 0.5173 | 0.5671 | 0.6221 |
| 1jyhA | 0.1711 | 0.1711 | 0.1911 | 0.6117 | 0.6117 |
| 2mhrA | 0.1866 | 0.2566 | 0.1866 | 0.4435 | 0.5914 |
| 3dqgA | 0.4662 | 0.2293 | 0.2198 | 0.4662 | 0.4662 |
| 1rybA | 0.4823 | 0.4746 | 0.4787 | 0.4492 | 0.4823 |
| 1roaA | 0.7402 | 0.66   | 0.66   | 0.7402 | 0.7876 |
| 1m8aA | 0.8438 | 0.8482 | 0.79   | 0.8482 | 0.8438 |
| 1a6mA | 0.8681 | 0.8374 | 0.8454 | 0.8472 | 0.8813 |
| 1xkrA | 0.1814 | 0.1989 | 0.1744 | 0.1814 | 0.1989 |
| 2tpsA | 0.7942 | 0.7786 | 0.7469 | 0.7942 | 0.7942 |
| 1eazA | 0.7428 | 0.7428 | 0.7428 | 0.7428 | 0.8347 |
| 1jbkA | 0.3851 | 0.3851 | 0.3851 | 0.3851 | 0.3851 |
| 1ej0A | 0.8654 | 0.8654 | 0.8654 | 0.8654 | 0.8654 |
| 1jfxA | 0.7684 | 0.7349 | 0.7258 | 0.7258 | 0.7684 |
| 1jo0A | 0.2064 | 0.2901 | 0.2499 | 0.4242 | 0.2321 |
| 1gbsA | 0.6079 | 0.5827 | 0.4937 | 0.5827 | 0.6079 |
| 1dsxA | 0.7194 | 0.7194 | 0.7194 | 0.7194 | 0.7658 |
| 1pkoA | 0.6752 | 0.6547 | 0.6547 | 0.6752 | 0.6752 |
| 2cuaA | 0.5056 | 0.5766 | 0.5056 | 0.581  | 0.581  |
| 1qf9A | 0.653  | 0.653  | 0.653  | 0.653  | 0.8486 |
| 1k6kA | 0.6858 | 0.7225 | 0.6858 | 0.7859 | 0.7859 |

|       |        |        |        |        |        |
|-------|--------|--------|--------|--------|--------|
| 1g9oA | 0.8211 | 0.8409 | 0.79   | 0.8409 | 0.8409 |
| 1i71A | 0.46   | 0.46   | 0.46   | 0.46   | 0.46   |
| 1fcyA | 0.8226 | 0.8226 | 0.8362 | 0.8444 | 0.8226 |
| 1fl0A | 0.5677 | 0.5677 | 0.581  | 0.5761 | 0.5761 |
| 1vmbA | 0.7571 | 0.7571 | 0.7571 | 0.7571 | 0.8056 |
| 1tifA | 0.2412 | 0.2698 | 0.2403 | 0.2698 | 0.328  |
| 1im5A | 0.8045 | 0.8002 | 0.8008 | 0.8045 | 0.8045 |
| 1i5gA | 0.6028 | 0.6028 | 0.5743 | 0.6491 | 0.6491 |
| 1k7jA | 0.8657 | 0.7014 | 0.8657 | 0.8657 | 0.8657 |
| 1h98A | 0.5834 | 0.638  | 0.6465 | 0.5834 | 0.5834 |
| 1pchA | 0.667  | 0.667  | 0.667  | 0.667  | 0.667  |
| 1atzA | 0.8338 | 0.7731 | 0.7794 | 0.8338 | 0.8338 |
| 1whiA | 0.1453 | 0.1646 | 0.172  | 0.2162 | 0.1539 |
| 1m4jA | 0.7156 | 0.7412 | 0.7269 | 0.7156 | 0.7412 |
| 1h2eA | 0.757  | 0.757  | 0.7981 | 0.9278 | 0.9278 |
| 1j3aA | 0.5911 | 0.5911 | 0.5911 | 0.597  | 0.597  |
| 1d4oA | 0.5227 | 0.5227 | 0.5227 | 0.5227 | 0.5227 |
| 1ej8A | 0.6263 | 0.624  | 0.6054 | 0.6263 | 0.6263 |
| 1htwA | 0.3815 | 0.324  | 0.3815 | 0.324  | 0.2857 |
| 1o1zA | 0.8567 | 0.8189 | 0.7612 | 0.8567 | 0.8567 |
| 1vfyA | 0.6956 | 0.7273 | 0.6123 | 0.6956 | 0.6956 |
| 1cc8A | 0.7185 | 0.7001 | 0.6862 | 0.7185 | 0.7185 |
| 1t8kA | 0.7151 | 0.728  | 0.712  | 0.7151 | 0.728  |
| 1bebA | 0.827  | 0.7851 | 0.7955 | 0.827  | 0.827  |
| 1lm4A | 0.7071 | 0.688  | 0.688  | 0.7031 | 0.7071 |
| 1jvwA | 0.6258 | 0.6365 | 0.6258 | 0.6459 | 0.6459 |
| 1a3aA | 0.7362 | 0.7362 | 0.7362 | 0.7362 | 0.8058 |
| 1a70A | 0.8355 | 0.7639 | 0.7608 | 0.8355 | 0.8355 |
| 1kidA | 0.4884 | 0.4884 | 0.4955 | 0.4884 | 0.4884 |

|       |        |        |        |        |        |
|-------|--------|--------|--------|--------|--------|
| 1hxnA | 0.4228 | 0.4228 | 0.4228 | 0.4228 | 0.4228 |
| 1cxyA | 0.8394 | 0.8394 | 0.8394 | 0.8394 | 0.8394 |
| 1vjkA | 0.7896 | 0.7199 | 0.7412 | 0.7896 | 0.7896 |
| 1g2rA | 0.2362 | 0.1983 | 0.2535 | 0.1983 | 0.2535 |
| 1svyA | 0.803  | 0.7656 | 0.7456 | 0.803  | 0.803  |
| 1dqgA | 0.6579 | 0.6579 | 0.6579 | 0.6579 | 0.6579 |
| 1guuA | 0.7951 | 0.6306 | 0.7505 | 0.7951 | 0.7951 |
| 1npsA | 0.8379 | 0.6953 | 0.6741 | 0.8379 | 0.8379 |
| 1ek0A | 0.8532 | 0.8532 | 0.8201 | 0.7312 | 0.7312 |
| 1dbxA | 0.8436 | 0.8537 | 0.7162 | 0.8436 | 0.8436 |
| 1josA | 0.5481 | 0.5481 | 0.5481 | 0.5481 | 0.5481 |
| 1jfuA | 0.6741 | 0.6767 | 0.6708 | 0.6741 | 0.6741 |
| 1c52A | 0.4528 | 0.4399 | 0.4341 | 0.4528 | 0.4447 |
| 1hfcA | 0.7134 | 0.6096 | 0.6096 | 0.7134 | 0.7134 |
| 1dixA | 0.6741 | 0.2034 | 0.3007 | 0.6741 | 0.6741 |
| 1mugA | 0.6658 | 0.6987 | 0.7259 | 0.6658 | 0.6658 |
| 1h0pA | 0.7217 | 0.7047 | 0.7217 | 0.7217 | 0.7217 |
| 1kw4A | 0.7685 | 0.7685 | 0.7685 | 0.7685 | 0.8101 |
| 1cznA | 0.749  | 0.6688 | 0.7234 | 0.749  | 0.749  |
| 1i58A | 0.5937 | 0.5937 | 0.5937 | 0.5688 | 0.5688 |
| 1h4xA | 0.6355 | 0.6734 | 0.6598 | 0.6355 | 0.6355 |
| 1bsgA | 0.8932 | 0.8932 | 0.8932 | 0.8932 | 0.8932 |
| 1fvgA | 0.7502 | 0.7502 | 0.7502 | 0.7502 | 0.7502 |
| 3borA | 0.9263 | 0.9263 | 0.9263 | 0.9263 | 0.9263 |
| 1fvkA | 0.6884 | 0.7598 | 0.7219 | 0.6884 | 0.6884 |
| 1vhuA | 0.8039 | 0.8039 | 0.8039 | 0.8039 | 0.8039 |
| 1ku3A | 0.7658 | 0.7658 | 0.7211 | 0.7333 | 0.7658 |
| 1r26A | 0.8493 | 0.8024 | 0.8493 | 0.8303 | 0.8303 |
| 1fqtA | 0.8467 | 0.8467 | 0.8467 | 0.8467 | 0.8467 |

|       |        |        |        |        |        |
|-------|--------|--------|--------|--------|--------|
| 1d1qA | 0.779  | 0.1914 | 0.1914 | 0.779  | 0.779  |
| 1p90A | 0.6467 | 0.6096 | 0.5407 | 0.6096 | 0.6467 |
| 1behA | 0.7267 | 0.7181 | 0.685  | 0.7267 | 0.7267 |
| 2arcA | 0.6151 | 0.457  | 0.3595 | 0.6151 | 0.6151 |
| 1jqA  | 0.3384 | 0.3296 | 0.3314 | 0.3384 | 0.2257 |
| 1tqgA | 0.8754 | 0.8754 | 0.8754 | 0.8754 | 0.8754 |
| 1kqrA | 0.1695 | 0.1686 | 0.1732 | 0.1631 | 0.1686 |
| 1iibA | 0.6201 | 0.6201 | 0.6201 | 0.6201 | 0.6201 |
| 1iwdA | 0.3321 | 0.1812 | 0.1602 | 0.3321 | 0.3321 |
| 1aapA | 0.6706 | 0.39   | 0.6706 | 0.6706 | 0.6706 |
| 1qjpA | 0.6454 | 0.5597 | 0.5597 | 0.6454 | 0.8176 |
| 5ptpA | 0.8397 | 0.8397 | 0.8397 | 0.8748 | 0.8748 |
| 1rw7A | 0.8423 | 0.75   | 0.7447 | 0.8423 | 0.8423 |
| 1xdzA | 0.4288 | 0.4288 | 0.4504 | 0.4288 | 0.4288 |
| 2vxnA | 0.4284 | 0.5067 | 0.3831 | 0.4284 | 0.5212 |
| 1dmgA | 0.5832 | 0.5832 | 0.5832 | 0.652  | 0.7163 |
| 1brfA | 0.365  | 0.365  | 0.1773 | 0.365  | 0.365  |
| 1fk5A | 0.3591 | 0.4037 | 0.3276 | 0.3591 | 0.3591 |
| 2hs1A | 0.4886 | 0.4886 | 0.4886 | 0.4886 | 0.4886 |
| 1gz2A | 0.7445 | 0.6859 | 0.7445 | 0.6943 | 0.8321 |
| 1lo7A | 0.7856 | 0.7856 | 0.7856 | 0.7856 | 0.8195 |
| 1lpyA | 0.583  | 0.583  | 0.583  | 0.583  | 0.612  |
| 1jl1A | 0.3818 | 0.2344 | 0.2344 | 0.3818 | 0.5852 |
| 1ihzA | 0.4628 | 0.2005 | 0.4628 | 0.4628 | 0.4628 |
| 1xffA | 0.2095 | 0.2268 | 0.2131 | 0.2254 | 0.2268 |
| 1jbeA | 0.8223 | 0.8206 | 0.8206 | 0.8219 | 0.8448 |
| 1nrvA | 0.8928 | 0.8908 | 0.8928 | 0.8928 | 0.8928 |
| 1fnaA | 0.8352 | 0.7646 | 0.8352 | 0.8352 | 0.8352 |
| 1k7cA | 0.7166 | 0.6115 | 0.6184 | 0.7166 | 0.7166 |

|                            |             |             |             |             |             |
|----------------------------|-------------|-------------|-------------|-------------|-------------|
| 1hh8A                      | 0.3344      | 0.3344      | 0.3132      | 0.3344      | 0.4129      |
| 1ql0A                      | 0.7694      | 0.7694      | 0.778       | 0.7694      | 0.7694      |
| 1tzvA                      | 0.7094      | 0.6282      | 0.6379      | 0.7094      | 0.7094      |
| 1gmxA                      | 0.719       | 0.719       | 0.719       | 0.719       | 0.768       |
| 1ktgA                      | 0.7311      | 0.6659      | 0.6659      | 0.7238      | 0.7238      |
| 1dlwA                      | 0.8075      | 0.8075      | 0.7924      | 0.8075      | 0.8075      |
| 1wjxA                      | 0.1699      | 0.1699      | 0.1699      | 0.1699      | 0.1699      |
| 1w0hA                      | 0.581       | 0.581       | 0.5399      | 0.581       | 0.7181      |
| 1rw1A                      | 0.7199      | 0.4827      | 0.4827      | 0.7199      | 0.7199      |
| <b>Mean</b>                | <b>0.63</b> | <b>0.59</b> | <b>0.58</b> | <b>0.64</b> | <b>0.66</b> |
| <b>% TM-score &gt; 0.5</b> | <b>75.7</b> | <b>71.6</b> | <b>69.6</b> | <b>77.7</b> | <b>80.4</b> |

\*\* excluding residue pairs with contact probability < 0.5 and excluding two targets (1tqhA and 1hdoA) for which RaptorX could not predict contact maps.

**Supplementary Table S3. Performance evaluation of different methods on 20 CASP 13 full-length targets**

| <b>Full-length Target</b> | <b>Pure threading</b> | <b>TripletRes(G032) assisted threading</b> | <b>RaptorX-Contact(G498) assisted threading</b> |
|---------------------------|-----------------------|--------------------------------------------|-------------------------------------------------|
| T0950                     | 0.1494                | 0.1714                                     | 0.1635                                          |
| T0951                     | 0.9338                | 0.9697                                     | 0.9697                                          |
| T0953s1                   | 0.1703                | 0.2868                                     | 0.2097                                          |
| T0953s2                   | 0.095                 | 0.2279                                     | 0.2279                                          |
| T0954                     | 0.301                 | 0.568                                      | 0.5607                                          |
| T0955                     | 0.1605                | 0.2099                                     | 0.2099                                          |
| T0957s1                   | 0.2481                | 0.2481                                     | 0.1784                                          |
| T0957s2                   | 0.2536                | 0.2769                                     | 0.2769                                          |
| T0958                     | 0.3646                | 0.4019                                     | 0.4019                                          |
| T0960                     | 0.1061                | 0.1606                                     | 0.1606                                          |
| T0963                     | 0.1011                | 0.1517                                     | 0.1517                                          |
| T0966                     | 0.8081                | 0.8081                                     | 0.8081                                          |
| T0968s1                   | 0.2104                | 0.2847                                     | 0.2847                                          |
| T0968s2                   | 0.2041                | 0.2657                                     | 0.2657                                          |

|                |              |              |              |
|----------------|--------------|--------------|--------------|
| T1003          | 0.8219       | 0.9033       | 0.9033       |
| T1005          | 0.5692       | 0.5692       | 0.5692       |
| T1008          | 0.389        | 0.389        | 0.389        |
| T1009          | 0.8074       | 0.8074       | 0.8074       |
| T1011          | 0.5615       | 0.5615       | 0.5615       |
| T1016          | 0.802        | 0.8724       | 0.8724       |
| <b>Mean</b>    | <b>0.403</b> | <b>0.457</b> | <b>0.449</b> |
| <b>P-value</b> | -            | 0.001        | 0.006        |

**Supplementary Table S4. Performance evaluation of different methods on 32 CASP13 domains**

| <b>Domain level Target</b> | <b>Pure threading</b> | <b>TripletRes(G032) assisted threading</b> | <b>RaptorX-Contact(G498) assisted threading</b> |
|----------------------------|-----------------------|--------------------------------------------|-------------------------------------------------|
| T0950-D1                   | 0.1494                | 0.1714                                     | 0.1635                                          |
| T0951-D1                   | 0.9338                | 0.9697                                     | 0.9697                                          |
| T0953s1-D1                 | 0.1748                | 0.2973                                     | 0.2055                                          |
| T0953s2-D1                 | 0                     | 0.1569                                     | 0.1569                                          |
| T0953s2-D2                 | 0.0976                | 0.2841                                     | 0.2841                                          |
| T0953s2-D3                 | 0.1164                | 0.1477                                     | 0.1477                                          |
| T0954-D1                   | 0.3057                | 0.5741                                     | 0.5669                                          |
| T0955-D1                   | 0.1605                | 0.2099                                     | 0.2099                                          |
| T0957s1-D1                 | 0.1879                | 0.1879                                     | 0.1633                                          |
| T0957s1-D2                 | 0.3146                | 0.3146                                     | 0.2694                                          |
| T0957s2-D1                 | 0.2549                | 0.2792                                     | 0.2792                                          |
| T0958-D1                   | 0.3646                | 0.4019                                     | 0.4019                                          |
| T0960-D1                   | 0.1556                | 0.1501                                     | 0.1501                                          |
| T0960-D2                   | 0.1511                | 0.2289                                     | 0.2289                                          |
| T0960-D3                   | 0.1309                | 0.333                                      | 0.333                                           |
| T0960-D4                   | 0.1752                | 0.1264                                     | 0.1264                                          |
| T0960-D5                   | 0.1696                | 0.2121                                     | 0.2121                                          |
| T0963-D1                   | 0.1466                | 0.1726                                     | 0.1726                                          |

|                |             |              |              |
|----------------|-------------|--------------|--------------|
| T0963-D2       | 0.1681      | 0.2646       | 0.2646       |
| T0963-D3       | 0.1423      | 0.2212       | 0.2212       |
| T0963-D4       | 0.1308      | 0.1178       | 0.1178       |
| T0963-D5       | 0.1419      | 0.1398       | 0.1398       |
| T0966-D1       | 0.8081      | 0.8081       | 0.8081       |
| T0968s1-D1     | 0.2104      | 0.2847       | 0.2847       |
| T0968s2-D1     | 0.2041      | 0.2657       | 0.2657       |
| T1003-D1       | 0.8219      | 0.9033       | 0.9033       |
| T1005-D1       | 0.5692      | 0.5692       | 0.5692       |
| T1008-D1       | 0.389       | 0.389        | 0.389        |
| T1009-D1       | 0.8074      | 0.8074       | 0.8074       |
| T1011-D1       | 0.714       | 0.714        | 0.714        |
| T1011-D2       | 0.9816      | 0.9816       | 0.9816       |
| T1016-D1       | 0.802       | 0.8724       | 0.8724       |
| <b>Mean</b>    | <b>0.34</b> | <b>0.392</b> | <b>0.387</b> |
| <b>P-value</b> | -           | 0.0002       | 0.0008       |

For T0953s2-D1 target, pure threading predicts a model, which does not have any common residue to the native.

**Supplementary Table S5. *p*-value of different contact-assisted threading methods on PSICOV150 dataset compared to baseline pure threading method. (*p*-values < 0.05 listed in bold)\***

|                | mfDCA-assisted<br>threading | PSICOV-assisted<br>threading | MetaPSICOV-assisted<br>threading |
|----------------|-----------------------------|------------------------------|----------------------------------|
| pure threading | <b>5.80E-08</b>             | <b>2.90E-05</b>              | 0.07                             |

\* excluding two targets (1tqhA and 1hdoA) for which RaptorX could not predict contact maps.
